# Supplementary material for: Synthesis and characteristics of a novel, high-nitrogen, heat-resistant, insensitive material (NOG2Tz)
Source: Royal Society of Chemistry journal article supplement (doi:10.1039/c1jm14232a), 2011-11-14
Supplement: c1jm14232a.pdf [file c1jm14232a.pdf]

Supporting Information

## Synthesis and Characteristics of a Novel, High-Nitrogen, Heat-Resistant, Insensitive Material (NOG<sub>2</sub>Tz)

Zhanda Fu,<sup>†</sup> Cheng He<sup>†</sup>, and Fu-Xue Chen<sup>†\*</sup>  
fuxue.chen@bit.edu.cn

|                                    |    |
|------------------------------------|----|
| General.....                       | S1 |
| 7.....                             | S2 |
| 8.....                             | S2 |
| X-ray structure of 7, 8·2DMSO..... | S3 |
| MOPAC calculation.....             | S5 |
| Spectra of 7.....                  | S7 |
| Spectra of 8.....                  | S8 |

### General

<sup>1</sup>H and <sup>13</sup>C NMR spectra were recorded on a Bruker Advance 400 spectrometer at 400 and 100 MHz, respectively. Chemical shifts are reported in ppm relative to TMS. The solvent is [D<sub>6</sub>]dimethyl sulphoxide (DMSO-*d*<sub>6</sub>) unless otherwise specified. The melting, decomposition points and TG are recorded with the peak value on a METTLER TOLEDO differential scanning calorimeter at a scan rate of 10 °C min<sup>-1</sup>. IR spectra were recorded on an IR-408 using KBr pellets. ESI-MS were recorded and analysed on an Agilent 500-MS, a Bruker Apex IV FTMS and a Bruker Compass Data Analysis 4.0. NOG and BT were prepared according to reported methods.<sup>1</sup> Other materials were purchased from Alfa Aesar.

**Caution!** When handling these energetic materials, small scale and good safety practices (leather gloves, face shield) are strongly encouraged.

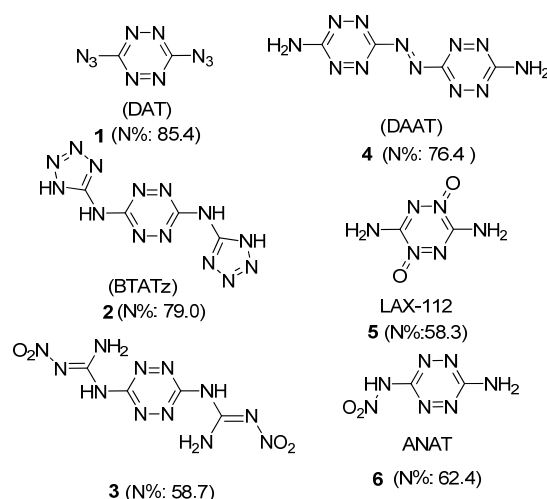

**Figure S1** High-nitrogen *s*-tetrazine derivatives for energetic material applications

### 3-methoxy-5-methoxy-1,2,4-oxadiazole (7)

NOG (344 mg, 2 mmol) was added to a solution of methanol (8 mL) and sodium methoxide (30% solution in methanol, 720 mg, 4 mmol). The mixture was stirred with an overhead stirrer at 70 °C, then BT (270 mg, 1 mmol) was added in portions over 3-5 min. The reaction was maintained at 70 °C for 2 h. The reaction was then poured into ice water (10 mL) and acidified by adding 3N HCl, until the pH was equal to 1. The pink-orange precipitate was filtered, washed thoroughly with water and air dried to give **7** (280 mg, 89.2%).  $T_{dec}$ : 260 °C.  $^1\text{H}$  NMR (400 MHz, DMSO- $d_6$ ):  $\delta_{\text{H}}$  7.01 (bs, 4H, NH<sub>2</sub>), 3.83 (s, 3H, CH<sub>3</sub>) ppm.  $^{13}\text{C}$  NMR (100 MHz DMSO- $d_6$ ):  $\delta_{\text{C}}$  56.2, 159.4, 172.4, 174.2 ppm. IR (KBr)  $\nu_{\text{max}}$ : 3439, 3367, 3192, 3121, 2957, 2759, 1670, 1645, 1586, 1562, 1524, 1465, 1385, 1282, 1100, 1005, 1003, 976, 771, 514  $\text{cm}^{-1}$ . ESI-MS (157):  $m/z$  positive mode, 158[M+H]<sup>+</sup>; 180[M+23]<sup>+</sup>.

### 3,6-bis(3-nitro-1,2,4-oxadiazole-5-guanyl)-1,2,4,5-tetrazine (8)

NOG (860 mg, 5 mmol) was placed in an oven-dried, round-bottomed flask (50 mL) with a stirbar and dissolved in anhydrous dimethylformamide (20 mL). The solution was cooled to 0 °C and NaH (60% dispersion in oil, 280 mg, 7 mmol) was added in portions over 5 min. The reaction was stirred for 30 min at 0 °C and BT (540 mg, 2 mmol) was added in one portion. The reaction was stirred at 0 °C for 1 h and then allowed to warm to room temperature and stirred for an additional 4 h. The reaction was then poured into ice water (20 mL) and acidified by the addition of 3 N HCl until the pH was equal to 1. The orange precipitate was filtered, washed thoroughly with water and dried to give **8** (800 mg, 94.7%).  $T_{dec}$ : 329 °C,  $^1\text{H}$  NMR (400 MHz, DMSO- $d_6$ ):  $\delta_{\text{H}}$  12.36 (bs, NH), 9.27 (bs, 2H), 8.74(bs, 2H) ppm.  $^{13}\text{C}$  NMR (100 MHz, DMSO- $d_6$ ):  $\delta_{\text{C}}$  155.8, 159.2, 169.0, 175.3 ppm. IR (KBr)  $\nu_{\text{max}}$ : 3365, 3264, 3216, 1633, 1568, 1538, 1477, 1405, 1386, 1302, 1052, 1026, 980, 955, 828, 787, 755, 695, 599  $\text{cm}^{-1}$ . HRMS (421.0584):  $m/z$  negative mode, 421.05796 [M-H]<sup>-</sup>. The crystal density was calculated by a patented method.<sup>2</sup>

X-ray analysis data of **7** and **8**·2DMSO

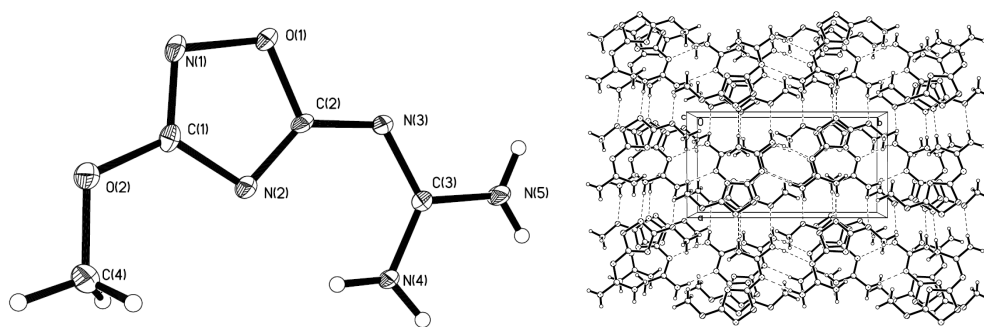

**Figure S1** Displacement ellipsoid plot (30%) and ball-and-stick packing diagram of **7**.

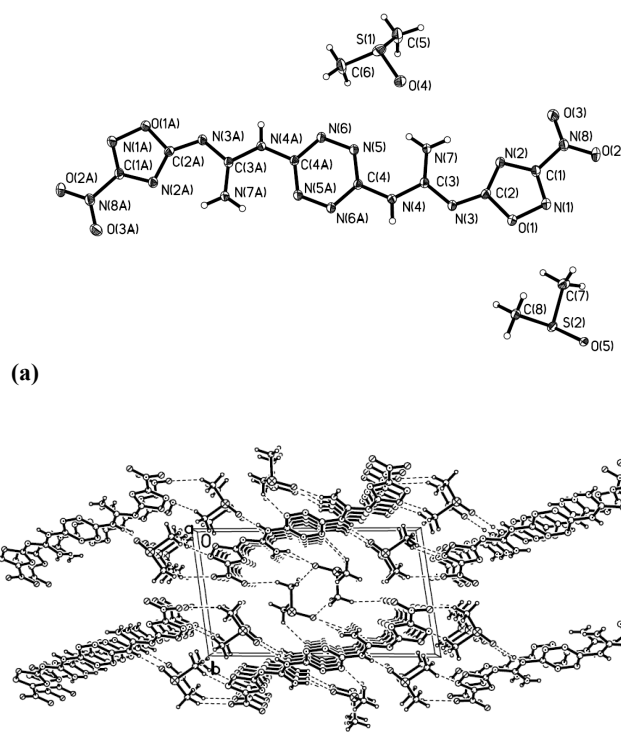

**Figure S2** Displacement ellipsoid plot (30%) (a) and ball-and-stick packing diagram (b) of **8**·2DMSO

**Table S1** Crystallographic data for **7** and **8**·2DMSO

| Compound              | <b>7</b>                                                    | <b>8</b> ·2DMSO                                                               |
|-----------------------|-------------------------------------------------------------|-------------------------------------------------------------------------------|
| Empirical formula     | C <sub>4</sub> H <sub>7</sub> N <sub>5</sub> O <sub>2</sub> | C <sub>12</sub> H <sub>18</sub> N <sub>16</sub> O <sub>8</sub> S <sub>2</sub> |
| Formula weight        | 157.15                                                      | 578.09                                                                        |
| Temperature           | 153(2) K                                                    | 153(2) K                                                                      |
| Wavelength            | 0.71073 Å                                                   | 0.71073 Å                                                                     |
| Crystal system, space | Monoclinic, P2(1)/c                                         | Triclinic, P-1                                                                |

|                                   |                                                                                     |                                                                                                   |
|-----------------------------------|-------------------------------------------------------------------------------------|---------------------------------------------------------------------------------------------------|
| group                             |                                                                                     |                                                                                                   |
| Unit cell dimensions              | a= 7.129(3) Å<br>α=90°<br>b= 13.514(5) Å<br>β= 91.715(5)°<br>c= 6.915(3) Å<br>γ=90° | a=5.750(2) Å<br>α=80.614(11)°<br>b=8.875(3) Å<br>β=80.732(10)°<br>c =15.739(6) Å<br>γ=81.456(10)° |
| Volume                            | 665.9(5) Å <sup>3</sup>                                                             | 775.9(5) Å <sup>3</sup>                                                                           |
| Z, Calculated density             | 4, 1.567 g cm <sup>-3</sup>                                                         | 1, 1.573 g cm <sup>-3</sup>                                                                       |
| Absorption coefficient            | 0.128 mm <sup>-1</sup>                                                              | 0.383 mm <sup>-1</sup>                                                                            |
| F(000)                            | 328                                                                                 | 382                                                                                               |
| Crystal size                      | 0.32 × 0.28 × 0.11 mm                                                               | 0.61 × 0.21 × 0.07 mm                                                                             |
| Theta range for data collection   | 2.86° to 29.10°                                                                     | 2.34° to 29.09°                                                                                   |
| Limiting indices                  | -7<=h<=9, -18<=k<=18,<br>-9<=l<=9                                                   | -7<=h<=7, -10<=k<=12,<br>-21<=l<=21                                                               |
| Reflections collected/unique      | 5660/1753 [R(int)= 0.0387]                                                          | 8329/4037 [R(int)=0.0305]                                                                         |
| Completeness to theta=27.48       | 98.2%                                                                               | 97.0%                                                                                             |
| Absorption correction             | None                                                                                | Semi-empirical from equivalents                                                                   |
| Refinement method                 | Full-matrix least-squares on F <sup>2</sup>                                         | Full-matrix least-squares on F <sup>2</sup>                                                       |
| Data/restraints/parameters        | 1753/0/177                                                                          | 4037/19/279                                                                                       |
| Goodness-of-fit on F <sup>2</sup> | 1.002                                                                               | 1.002                                                                                             |
| Final R indices                   | R <sub>1</sub> =0.0492, wR <sub>2</sub> =0.1355                                     | R <sub>1</sub> =0.0511, wR <sub>2</sub> =0.1117                                                   |

|                             |                                                 |                                                 |
|-----------------------------|-------------------------------------------------|-------------------------------------------------|
| [I>2sigma(I)]               |                                                 |                                                 |
| R indices (all data)        | R <sub>1</sub> =0.0784, wR <sub>2</sub> =0.1470 | R <sub>1</sub> =0.0858, wR <sub>2</sub> =0.1271 |
| Largest diff. peak and hole | 0.287 and -0.235 e. Å <sup>-3</sup>             | 0.595 and -0.346 e. Å <sup>-3</sup>             |

**Calculated total energy (E<sub>0</sub>), zero-point energy (ZPE), enthalpy of formation (HOF) of compound 8**

Isodesmic reactions for compound 8

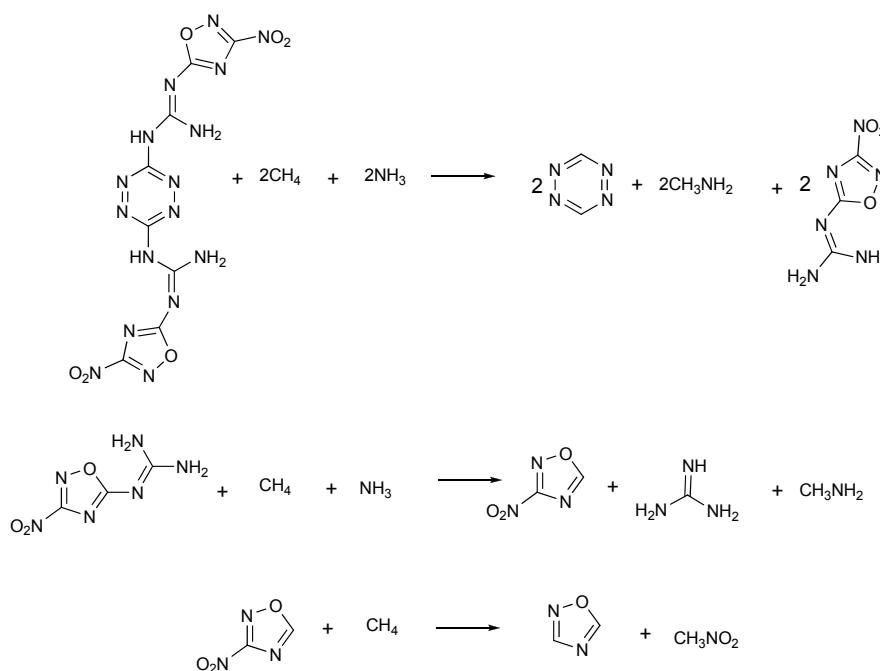

All the calculations are done at the semi-empirical level using the PM6 method<sup>3</sup> implemented in the MOPAC package.<sup>4</sup> The heat of formation is obtained at room temperature (298.15K) throughout the atomisation reaction.

**Table S2** Calculated heats of formation by MOPAC

| Compd.     | E <sub>0</sub> /ev | ZPE/ev        | HOF/(KJ mol <sup>-1</sup> ) |
|------------|--------------------|---------------|-----------------------------|
| <b>NOG</b> | -2367.64277        | 2.60549941449 | 235.07941                   |
| <b>8</b>   | -5667.81698        | 5.60450188663 | 957.34882                   |

### References

1. (a) Z. Fu, R. Su, Y. Wang, Y.-F. Wang, W. Zeng, N. Xiao, Y. Wu, Z. Zhou, J. Chen and F.-X. Chen, *Angew. Chem., Int. Ed.*, submitted, DOI: 10.1002/anie.201105870; (b) Y. Li, A. Asadi and D. M. Perrin, *J. Fluorine Chem.*, 2009, **130**, 377-382
2. Y.-K. Wu, D.-Y. Chen, H.-S. Dong, *Chinese Patent*, 2011, CN101957300A.
3. J. J. P. Stewart, *J. Mol. Modeling*, 2007, **13**, 1173-1213.
4. MOPAC2009, J. J. P. Stewart, *Stewart Computational Chemistry*, Colorado Springs: CO, USA, [HTTP://OpenMOPAC.net](http://OpenMOPAC.net) (2008).

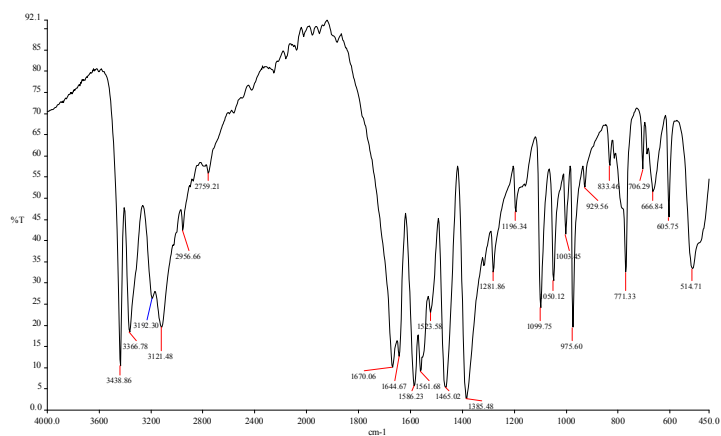

Figure S1 IR spectra of 7

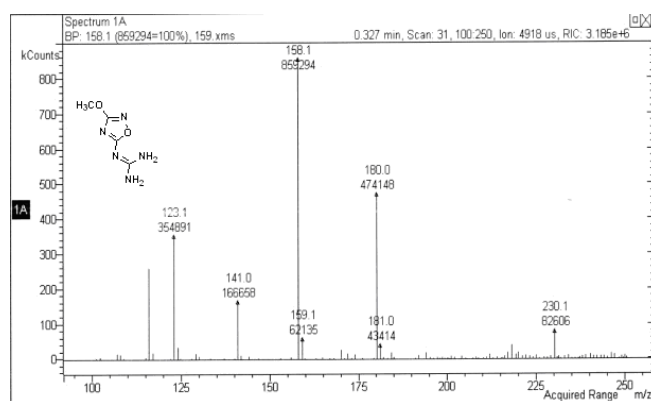

Figure S2 ESI of 7

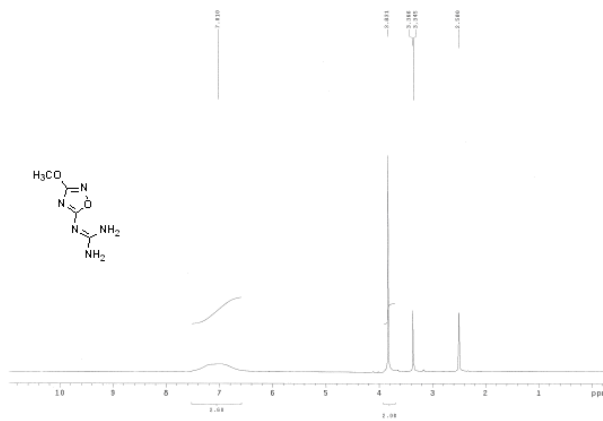

Figure S3 <sup>1</sup>H NMR of 7

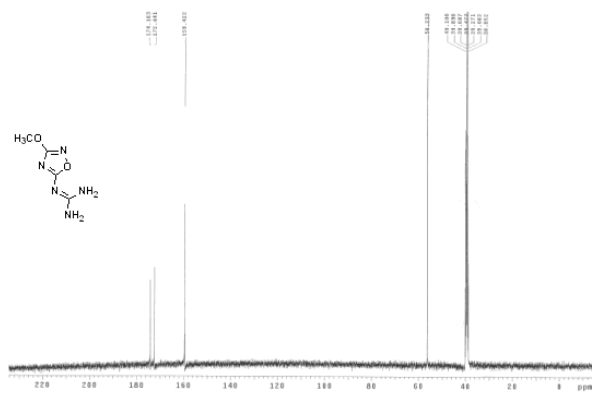

**Figure S4** <sup>13</sup>C NMR of 7

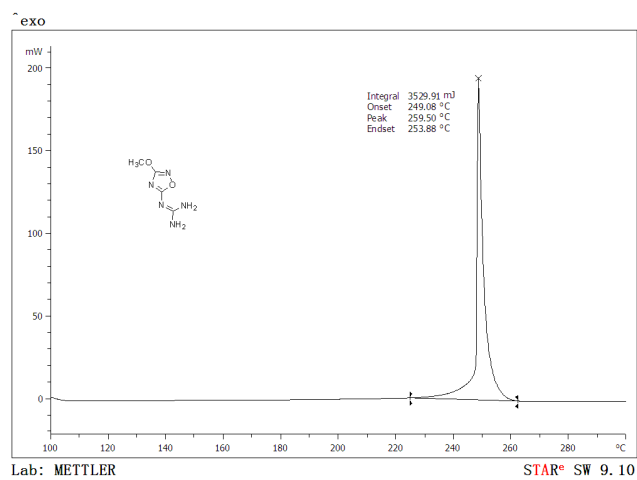

**Figure S5** DSC of 7





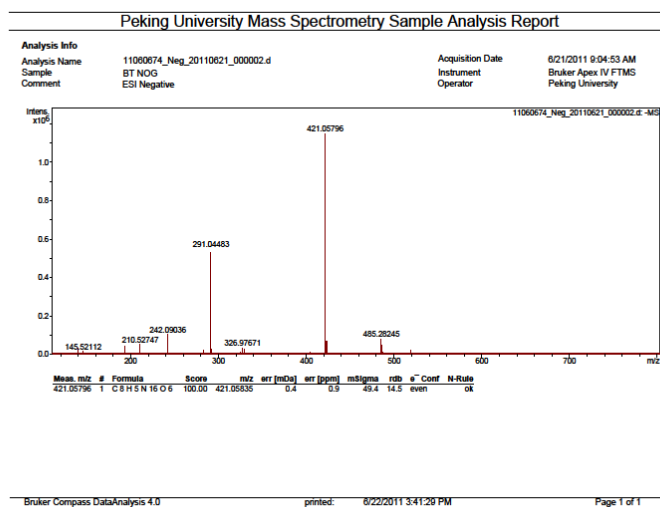

**Figure S9** HRMS of **8**

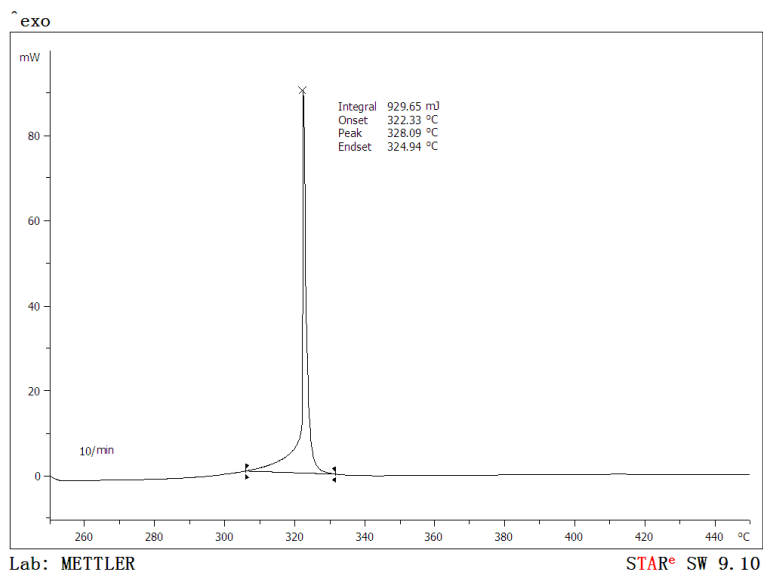

**Figure S10** DSC of **8**

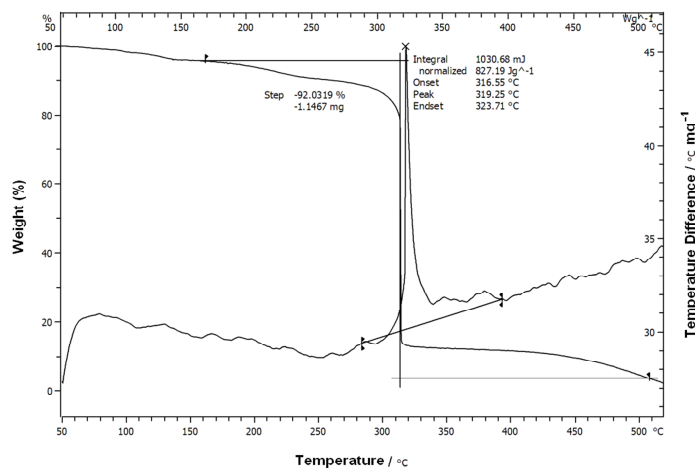

**Figure S11** TGA of **8**
